# Supplementary material for: Autoimmune anti-DNA and anti-phosphatidylserine antibodies predict development of severe COVID-19
Source: Life Sci Alliance. 2021 Sep 9;4(11):e202101180. doi: 10.26508/lsa.202101180 (PMC8441539; doi:10.26508/lsa.202101180)
Supplement: Supplementary file 2 [file LSA-2021-01180_SdataF2.xlsx]

## Sheet: Sheet1
ssDNA						dsDNA						DNA						CpG
NYC Controls	COVID-19	SLE	Colombian Controls	P. vivax		NYC Controls	COVID-19	SLE	Colombian Controls	P. vivax		NYC Controls	COVID-19	SLE	Colombian Controls	P. vivax		NYC Controls	COVID-19	SLE	Colombian Controls	P. vivax
0.724057	1.29356	0.532642	0.877243	1.1957		0.542513	0.904904	0.342391	0.848519	0.89493		0.344523	1.10681	0.266128	0.765304	0.595335		0.242577	0.736642	0.164092	0.664479	0.547923
0.298573	0.916496	0.918859	0.385969	0.943909		0.161022	0.681902	0.703415	0.289456	0.806151		0.0715977	0.732885	0.46239	0.219734	0.671031		0.101615	0.47223	0.342165	0.221186	0.612102
0.575665	1.00967	0.595857	0.353753	1.14349		0.503022	0.757282	0.412321	0.272295	1.06024		0.39167	0.91897	0.174725	0.227611	1.10318		0.468659	0.619802	0.0627679	0.41686	0.863868
0.265597	0.736792	1.1749	0.58158	1.11595		0.187185	0.766176	0.788163	0.427227	0.936559		0.134758	0.584455	0.649735	0.317249	1.10916		0.150752	0.653599	0.20999	0.443597	0.693123
0.554799	1.01119	1.1778	0.348427	1.19831		0.431596	0.797299	0.885707	0.220378	1.02511		0.374282	0.934711	1.14455	0.157306	1.11708		0.529117	0.843906	0.298466	0.179426	0.862531
0.552765	0.976472	1.28465	0.727148	1.02897		0.436787	0.935528	0.939815	0.604471	0.977613		0.346035	0.975067	1.28283	0.410322	1.06762		0.26786	0.854018	0.523183	0.388922	0.831211
0.895076	1.13699	1.32773	0.792975	0.760133		0.630862	0.890899	0.946987	0.682973	0.744723		0.215852	0.968673	1.2872	0.422832	0.522975		0.532207	0.488374	0.744549	0.576991	0.567916
0.560422	1.25415	1.28768	0.610336	0.843165		0.386483	0.890406	0.915394	0.467146	0.944383		0.134547	0.960616	1.18404	0.388291	0.922805		0.0903346	0.65692	0.68646	0.33882	0.802791
0.550439	0.783056	1.2615	0.72294	0.919735		0.380585	0.620578	0.897757	0.677773	0.818332		0.120727	0.68447	1.11995	0.713336	0.723263		0.0797699	0.459388	0.685018	0.587291	0.89214
0.575198	1.35755	1.579	0.609527	0.839044		0.427158	0.927404	1.10541	0.519215	0.729115		0.241861	1.05426	1.28753	0.416698	0.656884		0.204396	0.713282	0.72348	0.332919	0.737031
0.322375	0.914342	1.55375	0.960005	0.864033		0.199896	0.582133	1.11595	0.838136	0.800231		0.125503	0.679282	1.43526	0.546089	0.745818		0.121224	0.461535	0.50238	0.672744	0.634936
0.411012	0.969866	1.53001	0.378136	0.930894		0.310049	0.713334	1.0769	0.226286	0.88592		0.213933	0.882941	1.42734	0.140968	0.812379		0.494752	0.670485	0.840961	0.197083	0.683353
0.317957	0.560178	1.70457	0.788103	0.919573		0.257486	0.683074	1.35816	0.69401	0.804992		0.167641	0.554776	1.89086	0.665456	0.753073		0.0898859	0.732775	0.90945	0.792681	0.883948
0.474279	0.435401	1.62805	0.698159	0.907591		0.332697	0.735473	1.27299	0.572905	0.803874		0.171622	0.471408	1.56215	0.414168	0.784926		0.159653	0.81312	0.801243	0.707979	0.913779
		1.70725						1.28772						1.54759						0.930308
		1.79626						1.27681						1.8933						1.05495
		1.65057						1.272						1.58584						0.964386
		1.55841						1.1109						1.42518						0.941436
		1.52151						1.17259						1.43578						0.892641
		1.61629						1.23223						1.67398						0.985099
