# Supplementary material for: Autoimmune anti-DNA and anti-phosphatidylserine antibodies predict development of severe COVID-19
Source: Life Sci Alliance. 2021 Sep 9;4(11):e202101180. doi: 10.26508/lsa.202101180 (PMC8441539; doi:10.26508/lsa.202101180)
Supplement: Supplementary file 3 [file LSA-2021-01180_SdataF3.xlsx]

## Sheet: Sheet1
Anti-RBCL					Anti-PS					Anti-DNA
Control	Non-severe	Severe, Alive	Severe, Dead		Control	Non-severe	Severe, Alive	Severe, Dead		Control	Non-severe	Severe, Alive	Severe, Dead
0.194	0.218	0.193	0.398		0.0866152	0.177	0.211	0.87044		0.477	0.403	0.329	0.323
0.144	0.295	0.302	0.472		0.08642	0.218	0.13	0.208823		0.149	0.299	0.501	0.886
0.136	0.224	0.34	0.438		0.104075	0.07	0.181	0.801461		0.558	0.192	0.457	0.465
0.097	0.336	0.468	0.248		0.0549272	0.259	0.99	0.0902534		0.214	0.357	0.347	0.344
0.158	0.454	0.506	0.574		0.0859124	0.192	0.313	0.387676		0.246	0.312	0.595	0.662
0.293	0.407	0.712	0.359		0.131569	0.262	0.617	0.218962		0.412	0.329	0.639	0.27
0.143	0.372	0.178	0.34		0.113572	0.477	0.17	0.386113		0.349	0.389	0.451	0.548
0.095	0.297	0.196	0.289		0.0525108	0.131	0.178	0.141299		0.214	0.402	0.189	0.266
0.236	0.481	0.279	0.266		0.293189	0.4	0.303	0.183726		0.417	0.525	1.382	0.43
0.243	0.287	0.059	0.181		0.132324	0.344	0.065	0.335873		0.3	0.381	0.168	0.35
0.122	0.314	0.362	0.286		0.0913231	0.328	0.307	0.633162		0.205	0.229	0.693	0.544
0.204	0.225	0.233	0.268		0.0833682	0.136	0.288	0.208069		0.321	0.201	0.379	0.282
0.067	0.24	0.28	0.385		0.0560702	0.205	0.171	0.298694		0.182	0.359	0.191	0.287
0.144	0.167	0.138	0.671		0.118469	0.367	0.125	0.247137		0.207	0.283	0.184	0.362
0.17	0.157	0.13	0.469		0.122441	0.14	0.187	0.321449		0.236	0.18	0.322	0.265
0.187	0.15	0.325	0.334		0.136702	0.202	0.371	0.300486		0.225	0.267	0.618	0.684
0.093	0.483	0.181	0.543		0.0494956	0.299	0.109	0.600929		0.166	0.54	0.244	0.753
0.177	0.153	0.37	0.311		0.126641	0.206	0.236	0.194914		0.451	0.141	0.324	0.175
0.157	0.661	0.312	0.367		0.181501	0.202	0.307	0.257854		0.38	0.696	0.676	0.359
0.177	0.649	0.308	0.304		0.124555	0.295	0.243	0.185045		0.443	0.417	0.447	0.272
0.177	0.245	0.171	0.406		0.4515	0.234	0.098	0.139551		0.283191	0.283	0.161	0.733
0.122	0.389	0.531	0.368		0.0765	0.137	0.484	0.333634		0.0957432	0.387	0.734	0.191
0.11	0.363	0.207	0.276		0.0916	0.2	0.179	0.280228		0.227026	0.26	0.128	0.579
0.119	0.38	0.195	0.272		0.1737	0.239	0.201	0.15994		0.0532587	0.274	0.868	0.474
0.253	0.309	0.262	0.81		0.3127	0.229	0.321	0.856955		0.697581	0.352	0.894	0.816
0.164	0.149	0.272	0.527		0.1286	0.335	0.16	0.325799		0.628986	0.405	0.474	0.73
0.228	0.236	0.316	0.724		0.2816	0.165	0.129	0.559883		0.14646	0.16	0.548	0.626
0.172	0.16	0.574	0.143		0.2232	0.063	0.388	0.0810423		0.149566	0.151	0.662	0.252
0.212	0.688	0.663	0.573		0.1778	0.375	0.892	0.679174		0.711464	0.286	0.844	0.762
0.215	0.134	0.348	0.191		0.2861	0.073	0.309	0.116322		0.787969	0.416	0.576	0.194
0.141	0.111	0.35	0.26		0.2229	0.261	0.398	0.216		0.203696	0.087	0.221	0.324
0.142	0.425	0.182	0.178		0.2	0.103	0.208	0.149479		0.16847	0.367	0.272	0.154
0.135	0.259	0.59	0.446		0.1496	0.262	0.43	0.260173		0.377181	0.088	0.387	0.734
0.086	0.15	0.279			0.3399	0.064	0.143			0.249779	0.112	0.318
0.219	0.329	0.134			0.1245	0.248	0.092			0.315211	0.1	0.091
0.189	0.1	0.256			0.2425	0.16	0.11			0.272122	0.241	0.329
0.151	0.21	0.184			0.2742	0.233	0.293			0.409241	0.916	0.54
0.383	0.193	0.429			0.3	0.101	0.719			0.414987	0.163	0.623
0.109	0.377	0.529			0.1086	0.167	0.2			0.0842703	0.361	0.218
0.174	0.066	0.121			0.199	0.13	0.102			0.227102	0.359	0.466
		0.158					0.184					0.423
		0.899					1.071					0.917
		0.37					0.306872					0.324
		0.312					0.181796					0.676
		0.347					0.128875					0.253
		0.316										0.548
