# Supplementary material for: Autoimmune anti-DNA and anti-phosphatidylserine antibodies predict development of severe COVID-19
Source: Life Sci Alliance. 2021 Sep 9;4(11):e202101180. doi: 10.26508/lsa.202101180 (PMC8441539; doi:10.26508/lsa.202101180)
Supplement: Supplementary file 6 [file LSA-2021-01180_SdataF5.xlsx]

## Sheet: Sheet1
	R	Anti-RBC	Anti-PS	Anti-DNA	IC	p	Anti-RBC	Anti-PS	Anti-DNA	IC		Anti-RBC	Anti-PS	Anti-DNA	IC		Anti-RBC	Anti-PS	Anti-DNA	IC				*	<0.05
	D-DIMER	0.2155	0.1435	0.316	0.1639		0.05325	0.427833	0.003	0.135833				**					**					***	<0.001
Coagulation	PROTHOMBIN TIME	0.1983	0.1101	0.2696	0.1953		0.0661667	0.427833	0.012	0.107				*
	FIBRINOGEN	0.06477	0.03205	0.03614	0.05711		0.7465	0.8112	0.7877	0.6702
	APTT	0.03207	-0.02691	0.07831	0.07932		0.7465	0.8112	0.715667	0.529375														**	<0.01
Cell lysis	CREATINE KINASE	0.1229	0.1345	0.364	-0.01278		0.205	0.1652	0.0002	0.8955				***					***
	LDH	0.2	0.1764	0.3376	0.2065		0.0708	0.1282	0.0003	0.0594				***					***
	BANDS %	-0.02883	-0.1218	-0.02867	-0.06091		0.8408	0.5916	0.8563	0.82548
	BASOPHILS %	-0.02318	0.02194	0.01707	0.04773		0.8408	0.816	0.8563	0.82548
	EOSINOPHILS %	-0.0197	0.06224	0.1492	0.02507		0.8408	0.61056	0.190971	0.862145
	GRANULOCYTES, IMMATURE %	0.09511	0.05273	0.04282	0.1106		0.4812	0.635564	0.8563	0.4956
	METAMYELOCYTES %	-0.298	-0.2301	-0.05581	-0.01887		0.1578	0.3354	0.8563	0.8976
	MYELOCYTES %	-0.2804	-0.1868	-0.0357	-0.05885		0.1578	0.3974	0.8563	0.82548
	NEUTROPHILS %	0.06118	0.06986	0.2267	0.1842		0.688	0.61056	0.0444	0.1948				*
	NEUTROPHILS ABSOLUTE	0.1845	0.2059	0.3726	0.1728		0.1578	0.1806	0.00067668	0.2094				***					***
	EOSINOPHILS, ABSOLUTE	0.1086	0.1142	0.2994	0.07778		0.439714	0.398743	0.0056	0.715029				**					**
Granulocytes	WHITE BLOOD CELL COUNT	0.1459	0.1725	0.3095	0.2509		0.2398	0.2612	0.0048	0.054				**					**
	BASOPHILS ABSOLUTE	0.2431	0.2139	0.1778	0.1434		0.1212	0.1806	0.14856	0.31944
	GRANULOCYTES IMMATURE , ABSOLUTE	0.1667	0.1373	0.1596	0.2468		0.19272	0.36144	0.1888	0.054
Lymphocytes/Monocytes	ATYPICAL LYMPHOCYTES %	0.2166	0.2675	0.008011	0.01436		0.19572	0.07175	0.9511	0.952
	LYMPHOCYTE ABSOLUTE CALCULATED	0.171	0.2102	0.02673	0.07262		0.19572	0.09576	0.9511	0.93275
	LYMPHOCYTES %	0.1596	0.1909	0.1127	0.07634		0.19572	0.07175	0.32256	0.93275
	LYMPHOCYTES ABSOLUTE	0.2746	0.2727	0.2895	0.1025		0.0245	0.0266	0.0147	0.93275		*	*	*
	MONOCYTES %	-0.07737	0.0466	-0.1134	0.005672		0.479617	0.6209	0.32256	0.952
	MONOCYTES ABSOLUTE	0.1444	0.2312	0.2238	0.2263		0.19572	0.0511	0.0637	0.1183
	PLASMA CELLS %	-0.02149	-0.1517	-0.2172	0.03621		0.8873	0.3668	0.32256	0.952
Erythrocytes	ERYTHROCYTE SEDIMENTATION RATE	0.1961	0.2009	0.3056	0.3057		0.4158	0.388575	0.0854333	0.0850667
	HEMATOCRIT	0.2979	0.2485	0.1632	0.05814		0.0044	0.0271333	0.0999778	0.674544		**	*				**
	HEMOGLOBIN	0.3175	0.2566	0.163	0.05604		0.0044	0.0271333	0.0999778	0.674544		**	*				**
	RED BLOOD CELL COUNT	0.3059	0.285	0.06008	0.1419		0.0044	0.022	0.57596	0.2904		**	*				**
	MEAN CORPUSCULAR HEMOGLOBIN	-0.0214	-0.09684	0.1856	0.006402		0.92092	0.66704	0.0861667	0.9628
	MEAN CORPUSCULAR HEMOGLOBIN CONC	0.04947	-0.01499	-0.007788	-0.004394		0.92092	0.8869	0.9342	0.9628
	MEAN CORPUSCULAR VOLUME	0.05647	0.0221	0.3256	0.134		0.92092	0.8869	0.0044	0.2904				**					**
	RDW-SD	-0.001251	0.02761	0.3022	0.1265		0.9894	0.8869	0.0055	0.2904				**					**
	RDW-CV	-0.03579	0.01341	0.1973	0.1246		0.92092	0.8869	0.0861667	0.2904
	NUCLEATED RBC,ABSOLUTE	0.06685	0.08124	0.1862	0.257		0.92092	0.711517	0.0861667	0.0616
	NUCLEATED RED BLOOD CELLS %	0.01937	0.03488	0.1713	0.2334		0.92092	0.8869	0.0999778	0.06655
Platelets	IMMATURE PLATELET FRACTION, %	-0.3028	-0.3602	-0.03351	-0.1978		0.122	0.0486	0.8395	0.4548			*
	IMMATURE PLATELET FRACTION, ABSOLUTE	-0.02015	-0.1118	-0.06824	0.1249		0.9031	0.663867	0.8395	0.598133
	MEAN PLATELET VOLUME	-0.01217	-0.02347	0.1011	0.03886		0.9031	0.8042	0.5686	0.6815
	PLATELET COUNT	0.215	0.3236	0.1806	0.2637		0.084	0.0016	0.2136	0.0176			**		*			**
Cytokines/Inflammation	INTERFERON GAMMA	-0.07638	0.05746	0.01794	0.185		0.827591	0.838929	0.999	0.50775
	INTERLEUKIN 10	-0.09597	-0.1663	-0.0001801	0.1655		0.827591	0.7638	0.999	0.547929
	INTERLEUKIN 12	-0.05	0.1286	-0.1107	0.1072		0.845769	0.838929	0.90105	0.66125
	INTERLEUKIN 13	-0.02665	-0.1659	-0.03116	0.2181		0.8558	0.7638	0.999	0.3966
	INTERLEUKIN 2	-0.08605	0.08002	-0.00403	0.09785		0.827591	0.838929	0.999	0.66125
	INTERLEUKIN 2 RECEPTOR (CD25), SOLUBLE	0.07534	0.05322	0.087	0.1293		0.827591	0.838929	0.90105	0.626167
	INTERLEUKIN 4	-0.1236	-0.01731	-0.1894	0.1437		0.827591	0.906	0.5775	0.609
	INTERLEUKIN 5	0.03062	0.1837	-0.08165	-0.06124		0.8558	0.7638	0.90105	0.6759
	INTERLEUKIN 6	0.1302	0.07715	0.1734	0.054		0.827591	0.838929	0.5775	0.6759
	INTERLEUKIN 8	0.08946	0.09277	0.07663	0.07311		0.827591	0.838929	0.90105	0.6759
	INTERLEUKIN-1 BETA	-0.1061	-0.1826	-0.1408	0.2245		0.827591	0.7638	0.8365	0.3966
	TUMOR NECROSIS FACTOR-ALPHA	-0.08197	0.08546	0.007721	0.09212		0.827591	0.838929	0.999	0.66125
	FERRITIN	0.03851	-0.02608	0.1954	0.219		0.845769	0.838929	0.279	0.288
	C-REACTIVE PROTEIN	0.1749	0.1222	0.2566	0.1752		0.827591	0.7638	0.0885	0.337
	PROCALCITONIN	0.06695	0.03083	0.1274	0.1742		0.827591	0.838929	0.5775	0.337
Heart	B-TYPE NATRIURETIC PEPTIDE	-0.09152	-0.2426	-0.1073	0.09476		0.8497	0.2313	0.44	0.5538
	TRIGLYCERIDES	-0.03225	-0.03035	0.2183	0.1005		0.8497	0.8585	0.37875	0.5538
	TROPONIN I	0.03891	0.09075	0.1085	0.06386		0.8497	0.50865	0.37875	0.5538
Respiratory	HEMOGLOBIN, ABG	0.1936	0.2812	0.2568	-0.06436		0.3264	0.196267	0.274	0.9793
	HEMOGLOBIN, VBG	0.1654	0.1541	0.04812	0.002602		0.3264	0.3462	0.6929	0.9793
	METHEMOGLOBIN, ABG	0.1471	0.08383	0.2089	0.1562		0.328114	0.713733	0.38048	0.769067
	METHEMOGLOBIN, VBG	-0.07313	-0.09866	0.04666	-0.01148		0.496107	0.575822	0.6929	0.9793
	CARBON DIOXIDE	0.1402	0.1949	0.2495	0.07216		0.3264	0.196267	0.1152	0.9793
	CARBOXYHEMOGLOBIN, ABG	0.1578	0.007645	0.1033	0.1992		0.3264	0.955	0.6929	0.769067
	HCO3, ABG	0.009937	0.06909	0.1425	-0.02446		0.941	0.746215	0.508622	0.9793
	O2 CONTENT (SAT), ABG	0.2189	0.04704	0.1614	0.153		0.3264	0.817387	0.4632	0.769067
	O2 CONTENT (SAT), VBG	0.1064	0.1455	0.03957	0.006231		0.328114	0.3462	0.6929	0.9793
	OXYHEMOGLOBIN, ABG	0.1579	0.08674	0.1651	0.08253		0.3264	0.713733	0.4632	0.9793
	OXYHEMOGLOBIN, VBG	0.1162	0.1598	0.04496	0.01253		0.3264	0.3462	0.6929	0.9793
	PCO2, ABG	0.1868	0.109	0.2409	0.2683		0.3264	0.66448	0.274	0.6672
	PO2, ABG	0.163	0.03989	0.1596	0.1719		0.3264	0.817387	0.4632	0.769067
	PCO2, VBG	0.1439	0.1359	0.07001	0.02991		0.3264	0.3462	0.6929	0.9793
	PO2, VBG	0.1249	0.1402	0.04044	0.04533		0.3264	0.3462	0.6929	0.9793
Kidney	ANION GAP	0.1145	0.2235	0.1058	0.3194		0.5284	0.0656	0.53415	0.006					**					**
	BLOOD UREA NITROGEN	0.1202	0.1094	0.1482	0.293		0.5284	0.428229	0.53415	0.006					**					**
	CREATININE	0.07503	0.08478	0.07847	0.2929		0.55752	0.490267	0.539333	0.006					**					**
	EGFR MDRD AFRICAN AMERICAN	0.06887	0.05907	0.05931	-0.1486		0.55752	0.63672	0.588982	0.27096
	EGFR MDRD NON AFRICAN AMERICAN	0.08976	0.04711	0.05774	-0.07244		0.55752	0.6732	0.588982	0.588933
	HYALINE CASTS	0.05457	0.2116	0.1052	-0.1024		0.690436	0.14712	0.53415	0.588933
	PH, URINE	-0.08909	0.01788	0.1095	-0.05197		0.55752	0.8733	0.53415	0.6796
	PHOSPHORUS, INORGANIC	0.1737	0.1102	0.106	0.1555		0.5284	0.490267	0.53415	0.3314
	RED BLOOD CELLS, URINE	0.3023	0.2946	0.2947	0.2536		0.0768	0.048	0.096	0.0696			*
	SPECIFIC GRAVITY, URINE	0.1247	0.3414	0.1108	-0.06443		0.5284	0.0204	0.53415	0.67824			*
	SQUAMOUS EPITHELIAL, URINE	0.1613	0.2376	0.1428	0.04689		0.5284	0.1014	0.53415	0.6796
	WHITE BLOOD CELLS, URINE	0.009279	0.1302	0.05935	0.09555		0.9349	0.428229	0.601	0.588933
Liver	ALBUMIN	-0.02479	0.02785	-0.1628	-0.08995		0.891675	0.7676	0.12315	0.381487
	ALKALINE PHOSPHATASE	-0.0008227	-0.08674	0.01006	0.1335		0.993	0.53505	0.915	0.279
	ALT	0.1746	0.05509	0.2498	0.2303		0.205875	0.718329	0.03195	0.05985				*
	AST	0.1688	0.09342	0.2869	0.2019		0.205875	0.53505	0.0171	0.0915				*
	BILIRUBIN DIRECT	0.1388	0.1092	0.1936	0.1698		0.25344	0.53505	0.0702	0.1593
	BILIRUBIN TOTAL	0.1581	0.1361	0.1963	0.107		0.205875	0.4407	0.0702	0.328114
	PROTEIN, TOTAL	0.3748	0.3432	0.2278	0.2347		0.00033147	0.0018	0.0429	0.05985		***	**	*			***	**
	UROBILINOGEN, URINE	0.0772	0.2105	0.08503	-0.1277		0.7359	0.25965	0.575357	0.328114
Metabolic	BASE DEFICIT, ABG	-0.02534	0.0005994	0.001117	0.1866		0.900312	0.9968	0.994	0.644722
	BASE EXCESS, ABG	-0.07823	-0.002683	0.1172	-0.03159		0.79725	0.9968	0.9765	0.878
	CALCIUM	0.06503	0.1025	0.01651	0.04721		0.79725	0.641136	0.994	0.878
	CHLORIDE	-0.01685	0.06222	0.1862	0.1047		0.900312	0.838437	0.31	0.66325
	CHLORIDE, ABG	-0.08301	-0.06747	-0.01905	0.08218		0.79725	0.904118	0.994	0.878
	CHLORIDE, VBG	-0.1558	-0.03391	0.06391	-0.03083		0.523333	0.956875	0.9765	0.878
	GLUCOSE	0.1887	0.1534	0.05132	0.1585		0.48125	0.362857	0.9765	0.3775
	GLUCOSE, ABG	0.1058	0.1436	-0.07402	0.09802		0.79725	0.641136	0.9765	0.878
	GLUCOSE, VBG	0.1831	0.1632	-0.06739	0.0178		0.48125	0.362857	0.9765	0.878
	GLUCOSE, POC	0.2055	0.1535	0.0418	0.01802		0.48125	0.589375	0.994	0.878
	IONIZED CALCIUM, ABG	0.07005	0.1441	0.09974	0.2395		0.79725	0.641136	0.9765	0.351
	LACTATE, ABG	0.2034	0.2519	0.2591	0.4083		0.523333	0.362857	0.31	0.0375					*
	LACTATE, VBG	-0.01977	0.04084	-0.001127	-0.03438		0.900312	0.949444	0.994	0.878
	LIPASE	-0.2037	-0.1161	-0.001482	0.1146		0.629167	0.838437	0.994	0.878
	MAGNESIUM	0.2015	0.2037	0.3044	0.2434		0.48125	0.362857	0.03	0.125				*
	PH, ABG	0.03882	0.09748	-0.03506	0.02284		0.900312	0.838437	0.994	0.878
	PH, VBG	0.1041	0.1654	0.1459	-0.01794		0.661042	0.362857	0.597917	0.878
	POTASSIUM	0.1345	0.1939	0.1447	0.1719		0.541786	0.362857	0.597917	0.351
	POTASSIUM, ABG	0.1404	0.01348	0.08019	0.1594		0.661042	0.9968	0.9765	0.644722
	POTASSIUM, VBG	0.06824	0.06928	0.003721	0.07242		0.79725	0.838437	0.994	0.878
	SODIUM	0.04436	0.1586	0.2122	0.202		0.79725	0.362857	0.285	0.253333
	SODIUM, ABG	0.01064	0.03063	0.03507	0.1604		0.9368	0.975476	0.994	0.644722
	SODIUM, VBG	-0.1286	0.0299	0.09278	0.01887		0.618125	0.956875	0.9765	0.878
	TEMPERATURE, ABG	0.1336	0.0828	0.1685	0.07125		0.661042	0.838437	0.736429	0.878
	TEMPERATURE, VBG	0.04969	0.004513	-0.01558	-0.03007		0.79725	0.9968	0.994	0.878
