# Supplementary material for: Autoimmune anti-DNA and anti-phosphatidylserine antibodies predict development of severe COVID-19
Source: Life Sci Alliance. 2021 Sep 9;4(11):e202101180. doi: 10.26508/lsa.202101180 (PMC8441539; doi:10.26508/lsa.202101180)
Supplement: Supplementary file 7 [file LSA-2021-01180_TableS2.xlsx]

## Sheet: Sheet1
Minimum values		N		R values					P values
				Anti-RBC	Anti-PS	Anti-DNA	IC		Anti-RBC	Anti-PS	Anti-DNA	IC
Coagulation	D-DIMER	114		0.1703	0.08669	0.1215	0.0698		0.1416	0.7385	0.3996	0.6201
	PROTHOMBIN TIME	108		0.2156	0.08791	0.06633	0.03254		0.101	0.7385	0.5002	0.7455
	FIBRINOGEN	58		-0.01689	-0.003769	-0.2221	-0.1079		0.9089	0.9874	0.3794	0.6201
	APTT	104		0.05346	0.03749	-0.09457	-0.1228		0.7944	0.9502	0.4573	0.6201
Cell lysis	CREATINE KINASE	108		0.1404	0.1396	0.1948	-0.0615		0.1488	0.3022	0.0875	0.5325
	LDH	111		0.1589	0.07719	0.125	0.2034		0.1488	0.4249	0.1932	0.0652
Granulocytes	BANDS %	51		0.04613	-0.07936	-0.1924	-0.06978		0.9065	0.7222	0.8985	0.8985
	BASOPHILS %	115		0.1282	0.1233	-0.06902	-0.0115		0.677	0.5824	0.9337	0.9337
	EOSINOPHILS %	115		0.009487	-0.1294	-0.2294	-0.04319		0.9806	0.5824	0.8985	0.8985
	GRANULOCYTES, IMMATURE %	111		0.003502	-0.05605	-0.07457	0.1723		0.9806	0.7222	0.5327	0.5327
	METAMYELOCYTES %	49		-0.1637	-0.2246	-0.2682	-0.07006		0.677	0.5824	0.8985	0.8985
	MYELOCYTES %	49		0.1191	-0.1363	-0.1175	-0.1417		0.8381	0.6765	0.8985	0.8985
	NEUTROPHILS %	115		-0.04903	-0.09983	-0.05761	-0.1139		0.9065	0.6765	0.8985	0.8985
	NEUTROPHILS ABSOLUTE	111		0.1103	-0.03989	0.02214	0.04126		0.677	0.7222	0.8985	0.8985
	EOSINOPHILS, ABSOLUTE	111		0.1073	-0.04799	-0.1176	0.01741		0.677	0.7222	0.9337	0.9337
	WHITE BLOOD CELL COUNT	115		0.03547	-0.08079	0.004552	0.00894		0.9065	0.6765	0.9337	0.9337
	BASOPHILS ABSOLUTE	111		0.1036	0.1247	-0.0761	0.1628		0.677	0.5824	0.5327	0.5327
	GRANULOCYTES IMMATURE , ABSOLUTE	111		0.04933	-0.03504	-0.06086	0.08235		0.9065	0.7222	0.8985	0.8985
Lymphocytes/Monocytes	ATYPICAL LYMPHOCYTES %	61		0.3199	0.1839	-0.03068	-0.07623		0.0848	0.6285	0.8721	0.7909
	LYMPHOCYTE ABSOLUTE CALCULATED	76		0.1089	0.1183	0.02005	-0.1263		0.6776	0.6285	0.8721	0.4896
	LYMPHOCYTES %	115		-0.04282	-0.08654	-0.1601	-0.2383		0.7653	0.6285	0.309	0.0728
	LYMPHOCYTES ABSOLUTE	111		0.08908	0.07526	0.01709	-0.02388		0.6776	0.6285	0.8721	0.8362
	MONOCYTES %	115		-0.02596	-0.03397	-0.2376	-0.1428		0.7908	0.8466	0.0749	0.3012
	MONOCYTES ABSOLUTE	111		0.06811	0.07331	-0.1159	-0.02087		0.6776	0.6285	0.5324	0.8362
	PLASMA CELLS %	46		0.107	-0.02917	0.03161	-0.2383		0.6776	0.8559	0.8721	0.3012
Erythrocytes	ERYTHROCYTE SEDIMENTATION RATE	55		0.1584	0.1859	0.06284	0.0288		0.459	0.4703	0.7206	0.843
	HEMATOCRIT	115		0.1289	0.09822	-0.09123	-0.04935		0.459	0.4703	0.4613	0.8067
	HEMOGLOBIN	115		0.1249	0.08012	-0.09921	-0.07629		0.459	0.4872	0.4613	0.7734
	RED BLOOD CELL COUNT	115		0.1264	0.1072	-0.1325	-0.04379		0.459	0.4703	0.4613	0.8067
	MEAN CORPUSCULAR HEMOGLOBIN	115		-0.0458	-0.1352	0.1005	-0.1053		0.851	0.4703	0.4613	0.6633
	MEAN CORPUSCULAR HEMOGLOBIN CONC	115		-0.03248	-0.137	-0.1523	-0.1993		0.851	0.4703	0.4613	0.2766
	MEAN CORPUSCULAR VOLUME	115		-0.01835	-0.1173	0.2122	-0.1116		0.8542	0.4703	0.2533	0.6633
	RDW-SD	115		-0.1184	-0.08822	0.02389	0.04231		0.459	0.484	0.808	0.8067
	RDW-CV	115		-0.1456	-0.1822	0.1239	-0.03167		0.459	0.4703	0.4613	0.8186
	NUCLEATED RBC,ABSOLUTE	115		-0.02805	-0.03206	0.07815	-0.1834		0.851	0.741	0.5017	0.2766
	NUCLEATED RED BLOOD CELLS %	115		-0.04109	-0.05341	0.09203	-0.09778		0.851	0.6342	0.4613	0.6633
Platelets	IMMATURE PLATELET FRACTION, %	39		-0.2924	-0.3878	0.009726	-0.3246		0.286	0.0594	0.9626	0.177
	IMMATURE PLATELET FRACTION, ABSOLUTE	39		-0.02091	-0.09962	-0.1116	0.08962		0.9084	0.697	0.672	0.791
	MEAN PLATELET VOLUME	114		-0.01411	-0.1112	-0.07059	-0.09618		0.9084	0.4828	0.672	0.6236
	PLATELET COUNT	115		0.05902	0.03758	-0.153	-0.0005919		0.9084	0.697	0.4145	1
Cytokines/Inflammation	INTERFERON GAMMA	49		-0.1077	0.09782	-0.003409	0.05724		0.9665	0.6049	0.9913	0.9676
	INTERLEUKIN 10	49		-0.01194	-0.08554	0.01759	0.1132		0.9665	0.6049	0.9913	0.9676
	INTERLEUKIN 12	49		0.01505	0.2322	-0.01645	-0.02515		0.9665	0.4106	0.9913	0.9676
	INTERLEUKIN 13	49		0.007919	0.01866	0.01351	0.07649		0.9665	0.9077	0.9913	0.9676
	INTERLEUKIN 2	49		-0.04132	0.2005	0.04929	0.007721		0.9665	0.478	0.9913	0.9676
	INTERLEUKIN 2 RECEPTOR (CD25), SOLUBLE	49		0.1259	0.1023	0.1224	0.09996		0.9665	0.6049	0.9913	0.9676
	INTERLEUKIN 4	49		-0.06655	0.1415	-0.1199	0.02689		0.9665	0.6049	0.9913	0.9676
	INTERLEUKIN 5	49		0.07524	0.2709	0.02408	-0.1505		0.9665	0.3833	0.9913	0.9676
	INTERLEUKIN 6	73		0.2372	0.209	0.2549	0.03769		0.656	0.3833	0.4484	0.9676
	INTERLEUKIN 8	49		0.1182	0.1907	0.1136	-0.01233		0.9665	0.478	0.9913	0.9676
	INTERLEUKIN-1 BETA	49		-0.07798	-0.09119	-0.01646	0.1527		0.9665	0.6049	0.9913	0.9676
	TUMOR NECROSIS FACTOR-ALPHA	49		0.01949	0.2692	0.1136	-0.03441		0.9665	0.3833	0.9913	0.9676
	FERRITIN	114		0.0849	-0.08585	0.03715	0.1877		0.9665	0.6049	0.9913	0.6893
	C-REACTIVE PROTEIN	114		-0.1007	-0.06048	-0.1393	-0.05877		0.9665	0.6049	0.9913	0.9676
	PROCALCITONIN	11		0.06748	-0.05945	-0.03057	0.1376		0.9665	0.6049	0.9913	0.9676
Heart	B-TYPE NATRIURETIC PEPTIDE	54		-0.1057	-0.1918	-0.1517	0.04123		0.6974	0.2494	0.4306	0.7749
	TRIGLYCERIDES	37		0.0677	0.2521	0.1348	-0.09982		0.6974	0.2494	0.4306	0.7749
	TROPONIN I	113		0.04738	-0.01315	-0.07584	0.1031		0.6974	0.8989	0.4306	0.7749
Respiratory	HEMOGLOBIN, ABG	58		-0.05727	0.05304	-0.04515	-0.2102		0.7801	1	1	0.8529
	HEMOGLOBIN, VBG	102		0.1321	0.1048	0.07117	-0.00755		0.6451	0.888	1	0.9829
	METHEMOGLOBIN, ABG	57		-0.2595	-0.225	-0.1929	-0.09648		0.6451	0.888	0.8949	0.9173
	METHEMOGLOBIN, VBG	102		-0.06917	-0.0895	-0.0278	-0.0142		0.7034	0.888	1	0.9829
	CARBON DIOXIDE	115		0.01917	-0.02441	-0.003734	-0.09669		0.8473	1	1	0.8529
	CARBOXYHEMOGLOBIN, ABG	57		-0.08891	-0.1706	-0.03909	-0.09451		0.7034	0.888	1	0.9173
	HCO3, ABG	58		-0.03292	0.0008769	-0.01729	-0.2437		0.8473	1	1	0.8529
	O2 CONTENT (SAT), ABG	57		-0.1192	-0.1287	-0.000682	-0.1293		0.6451	0.888	1	0.8529
	O2 CONTENT (SAT), VBG	102		0.101	-0.006502	0.09263	0.02949		0.6451	1	0.8949	0.9829
	OXYHEMOGLOBIN, ABG	57		-0.1177	-0.1112	-0.006677	-0.1313		0.6451	0.888	1	0.8529
	OXYHEMOGLOBIN, VBG	102		0.1026	-0.002205	0.09478	0.02819		0.6451	1	0.8949	0.9829
	PCO2, ABG	58		0.1282	0.1598	0.16	0.0572		0.6451	0.888	0.8949	0.9829
	PO2, ABG	58		-0.06838	-0.001539	0.0444	-0.02808		0.7701	1	1	0.9829
	PCO2, VBG	102		0.1214	-0.05487	0.1088	-0.003371		0.6451	1	0.8949	0.9829
	PO2, VBG	102		0.1109	-0.03299	0.1044	0.1046		0.6451	1	0.8949	0.8529
Kidney	ANION GAP	115		0.05824	-0.0424	-0.09109	0.04388		0.8127	0.7193	0.6515	0.7775
	BLOOD UREA NITROGEN	115		0.02651	-0.01925	-0.08609	0.1808		0.8127	0.8466	0.6515	0.1612
	CREATININE	115		-0.07214	-0.1088	-0.1686	0.1403		0.8127	0.4278	0.2882	0.3268
	EGFR MDRD AFRICAN AMERICAN	115		-0.1346	-0.1688	-0.1621	-0.2713		0.6911	0.4127	0.2882	0.0206
	EGFR MDRD NON AFRICAN AMERICAN	115		-0.12	-0.1456	-0.1564	-0.2523		0.6911	0.4127	0.2882	0.0263
	HYALINE CASTS	79		0.02826	0.1085	0.01692	0.005473		0.8127	0.5166	0.9532	0.9714
	PH, URINE	82		-0.1346	-0.1963	-0.08833	-0.1134		0.6911	0.4127	0.6515	0.5374
	PHOSPHORUS, INORGANIC	81		-0.1168	-0.1425	-0.1999	0.09241		0.7253	0.4127	0.2882	0.624
	RED BLOOD CELLS, URINE	80		0.2094	0.1473	0.09415	0.3262		0.6911	0.4127	0.6515	0.0206
	SPECIFIC GRAVITY, URINE	82		0.04215	0.1653	-0.01614	0.01646		0.8127	0.4127	0.9532	0.9714
	SQUAMOUS EPITHELIAL, URINE	80		0.06547	0.09045	-0.01658	-0.06266		0.8127	0.5722	0.9532	0.7775
	WHITE BLOOD CELLS, URINE	80		0.05874	0.05163	-0.008005	0.1378		0.8127	0.7193	0.9532	0.4499
Liver	ALBUMIN	115		-0.03965	-0.06389	-0.2231	-0.172		0.7779	0.804	0.0667	0.5333
	ALKALINE PHOSPHATASE	115		-0.1792	-0.2469	-0.2257	-0.1152		0.209	0.063	0.0667	0.7634
	ALT	115		0.1975	-0.04935	0.04844	0.06239		0.209	0.8087	0.6796	0.7634
	AST	115		0.1653	-0.01027	0.07049	0.02931		0.209	1	0.6115	0.7634
	BILIRUBIN DIRECT	114		0.01501	-0.07139	-0.1308	0.05123		0.8827	0.804	0.2767	0.7634
	BILIRUBIN TOTAL	115		0.06186	0.001163	-0.1453	-0.08789		0.6886	1	0.2767	0.7634
	PROTEIN, TOTAL	115		0.1432	0.06425	-0.1285	-0.03341		0.2561	0.804	0.2767	0.7634
	UROBILINOGEN, URINE	82		0.102	0.1745	0.04733	0.0397		0.5845	0.4719	0.6796	0.7634
Metabolic	BASE DEFICIT, ABG	48		-0.03616	-0.1173	-0.09339	0.09527		0.9808	0.8721	0.9864	0.8198
	BASE EXCESS, ABG	45		-0.1404	-0.1575	-0.2913	-0.2254		0.9029	0.8721	0.659	0.6964
	CALCIUM	115		-0.05673	-0.02832	-0.2092	-0.1066		0.9676	0.9878	0.6262	0.6964
	CHLORIDE	115		-0.1739	-0.1164	-0.05967	-0.09252		0.4507	0.8721	0.9864	0.6964
	CHLORIDE, ABG	58		-0.01614	-0.01583	0.01846	-0.1207		0.9808	0.9878	0.9864	0.6964
	CHLORIDE, VBG	101		-0.1253	-0.06601	0.05218	0.08461		0.7636	0.8721	0.9864	0.6964
	GLUCOSE	115		0.1671	0.06967	-0.002676	-0.1199		0.4507	0.8721	0.9872	0.6964
	GLUCOSE, ABG	58		0.09134	0.07959	-0.01051	-0.1506		0.9676	0.8721	0.9864	0.6964
	GLUCOSE, VBG	102		0.226	0.1268	-0.01387	0.1223		0.4507	0.8721	0.9864	0.6964
	GLUCOSE, POC	75		0.09925	0.1246	-0.09469	-0.1004		0.9111	0.8721	0.9864	0.6964
	IONIZED CALCIUM, ABG	58		-0.2189	-0.1511	-0.03113	-0.2426		0.4507	0.8721	0.9864	0.6964
	LACTATE, ABG	58		0.009092	0.01125	0.1111	-0.03084		0.9808	0.9878	0.9864	0.9908
	LACTATE, VBG	102		0.01389	-0.01476	0.01376	0.009272		0.9808	0.9878	0.9864	0.9908
	LIPASE	37		0.03487	0.0849	0.1458	0.01103		0.9808	0.9169	0.9864	0.9908
	MAGNESIUM	111		0.01422	-0.102	0.0124	-0.03957		0.9808	0.8721	0.9864	0.9908
	PH, ABG	58		-0.2138	-0.08628	-0.2072	-0.3458		0.4507	0.8721	0.7487	0.197
	PH, VBG	102		0.05619	-0.008865	0.1654	0.01433		0.9676	0.9878	0.7487	0.9908
	POTASSIUM	115		-0.01359	-0.06569	-0.1143	-0.09077		0.9808	0.8721	0.9864	0.6964
	POTASSIUM, ABG	58		0.07628	0.002558	0.02469	-0.1473		0.9676	0.9946	0.9864	0.6964
	POTASSIUM, VBG	102		0.005832	-0.07001	-0.03637	0.01613		0.9808	0.8721	0.9864	0.9908
	SODIUM	115		-0.1862	-0.1227	-0.06479	-0.0156		0.4507	0.8721	0.9864	0.9908
	SODIUM, ABG	58		-0.1409	-0.05009	-0.01621	-0.04393		0.8173	0.9878	0.9864	0.9908
	SODIUM, VBG	102		-0.112	-0.007679	0.06278	0.08181		0.8173	0.9878	0.9864	0.6964
	TEMPERATURE, ABG	58		0.004862	0.1051	0.0627	-0.1244		0.9808	0.8721	0.9864	0.6964
	TEMPERATURE, VBG	102		0.02401	-0.132	-0.09526	0.002386		0.9808	0.8721	0.9864	0.9908
